# Supplementary material
Source: PubMed Central journal article supplement (PMC3631344)
Supplement: supp_mct061_mct061supp.pdf [file supp_mct061_mct061supp.pdf]

## SUPPLEMENTARY DATA

FIG. S1. The study plant in the Arboretum of the Botanical Garden of the University of Tübingen.

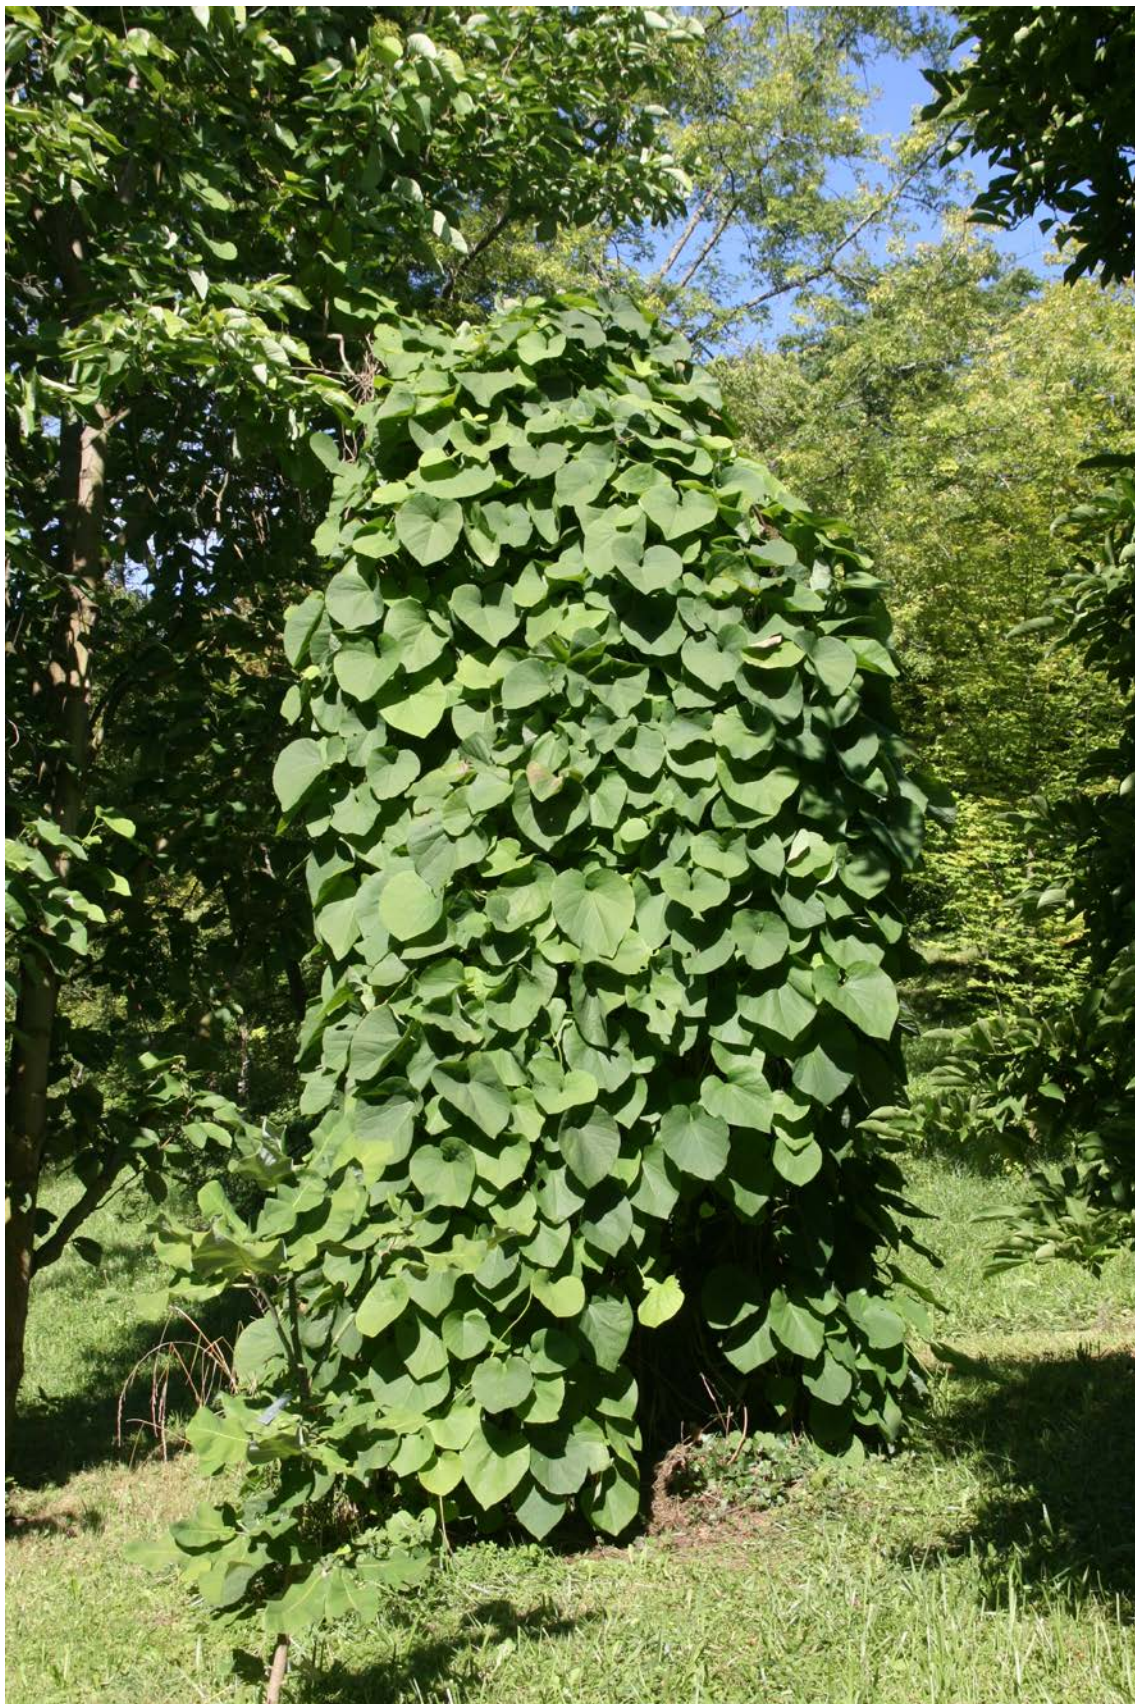

FIG. S2. The leaf zones that were used for determining venation density.

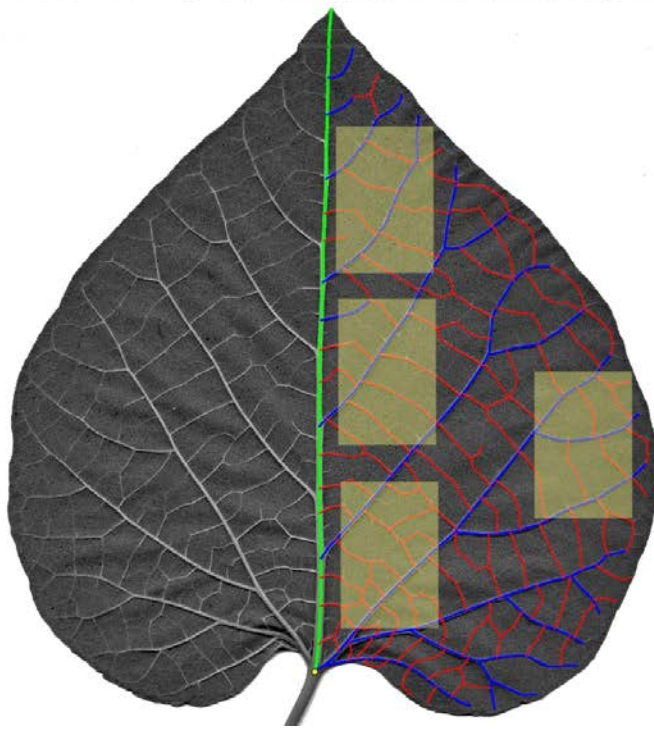

[FIG. S3 is provided in a separate file]



Morning, later than 8:00 AM - 11:00 AM

| Lamina zone | Lamina zone |          |           |          |         |           |         |         |          |          |           |           |           |
|-------------|-------------|----------|-----------|----------|---------|-----------|---------|---------|----------|----------|-----------|-----------|-----------|
|             | 1           | 2        | 3         | 4        | 5       | 6         | 7       | 8       | 9        | 10       | 11        | 12        | 13        |
| 1           | 0           | 0.1103   | 0.4902    | 0.2119   | 0.03302 | 0.0004855 | 0.01046 | 0.00677 | 3.07E-05 | 0.001603 | 1.76E-05  | 0.4353    | 2.86E-06  |
| 2           | 1           | 0        | 0.3447    | 0.7658   | 0.6063  | 0.0361    | 0.1127  | 0.1615  | 0.002492 | 0.06823  | 0.0005259 | 0.5471    | 6.85E-05  |
| 3           | 1           | 1        | 0         | 0.5025   | 0.1235  | 0.003143  | 0.03495 | 0.02203 | 0.000219 | 0.008374 | 7.17E-05  | 0.8303    | 6.72E-06  |
| 4           | 1           | 1        | 1         | 0        | 0.4078  | 0.02033   | 0.07693 | 0.08862 | 0.002488 | 0.04148  | 0.0006481 | 0.8004    | 9.88E-05  |
| 5           | 1           | 1        | 1         | 1        | 0       | 0.0796    | 0.2144  | 0.3402  | 0.01313  | 0.1937   | 0.002386  | 0.3057    | 0.0002829 |
| 6           | 0.03787     | 1        | 0.2452    | 1        | 1       | 0         | 0.7554  | 0.461   | 0.6015   | 0.5221   | 0.1354    | 0.01164   | 0.0196    |
| 7           | 0.8156      | 1        | 1         | 1        | 1       | 1         | 0       | 0.5966  | 0.3277   | 0.773    | 0.108     | 0.06608   | 0.02232   |
| 8           | 0.528       | 1        | 1         | 1        | 1       | 1         | 1       | 0       | 0.1023   | 0.685    | 0.0259    | 0.09072   | 0.006065  |
| 9           | 0.002395    | 0.1943   | 0.01708   | 0.1941   | 1       | 1         | 1       | 1       | 0        | 0.1469   | 0.2944    | 0.002247  | 0.07005   |
| 10          | 0.125       | 1        | 0.6532    | 1        | 1       | 1         | 1       | 1       | 1        | 0        | 0.02033   | 0.04513   | 0.002478  |
| 11          | 0.001372    | 0.04102  | 0.005589  | 0.05055  | 0.1861  | 1         | 1       | 1       | 1        | 1        | 0         | 0.0005817 | 0.4876    |
| 12          | 1           | 1        | 1         | 1        | 1       | 0.9076    | 1       | 1       | 0.1752   | 1        | 0.04537   | 0         | 4.03E-05  |
| 13          | 0.0002234   | 0.005342 | 0.0005242 | 0.007707 | 0.02207 | 1         | 1       | 0.4731  | 1        | 0.1933   | 1         | 0.003143  | 0         |

Noon, later than 11:00 AM - 2:00 PM

| Lamina zone | Lamina zone |         |        |        |         |         |        |          |        |         |         |           |           |
|-------------|-------------|---------|--------|--------|---------|---------|--------|----------|--------|---------|---------|-----------|-----------|
|             | 1           | 2       | 3      | 4      | 5       | 6       | 7      | 8        | 9      | 10      | 11      | 12        | 13        |
| 1           | 0           | 0.04738 | 0.2126 | 0.3261 | 0.01968 | 0.08552 | 0.7633 | 0.002045 | 0.1133 | 0.01773 | 0.02326 | 0.3575    | 0.002786  |
| 2           | 1           | 0       | 0.4542 | 0.3085 | 0.7216  | 0.8811  | 0.1914 | 0.3074   | 0.9132 | 0.2817  | 0.3606  | 0.002771  | 0.03996   |
| 3           | 1           | 1       | 0      | 0.805  | 0.2584  | 0.5784  | 0.5603 | 0.05274  | 0.4443 | 0.14    | 0.173   | 0.03085   | 0.02167   |
| 4           | 1           | 1       | 1      | 0      | 0.1653  | 0.3729  | 0.7152 | 0.02763  | 0.3504 | 0.08938 | 0.1001  | 0.05405   | 0.01275   |
| 5           | 1           | 1       | 1      | 1      | 0       | 0.7214  | 0.1762 | 0.3995   | 0.9479 | 0.4201  | 0.4598  | 0.0009172 | 0.07056   |
| 6           | 1           | 1       | 1      | 1      | 1       | 0       | 0.3434 | 0.2002   | 0.653  | 0.2444  | 0.2539  | 0.007596  | 0.04413   |
| 7           | 1           | 1       | 1      | 1      | 1       | 1       | 0      | 0.05638  | 0.1562 | 0.04415 | 0.03133 | 0.3473    | 0.005394  |
| 8           | 0.1595      | 1       | 1      | 1      | 1       | 1       | 1      | 0        | 0.6364 | 0.7517  | 0.8287  | 5.23E-05  | 0.1831    |
| 9           | 1           | 1       | 1      | 1      | 1       | 1       | 1      | 1        | 0      | 0.4286  | 0.4788  | 0.01787   | 0.0849    |
| 10          | 1           | 1       | 1      | 1      | 1       | 1       | 1      | 1        | 1      | 0       | 0.9936  | 0.001535  | 0.3584    |
| 11          | 1           | 1       | 1      | 1      | 1       | 1       | 1      | 1        | 1      | 1       | 0       | 0.001786  | 0.3068    |
| 12          | 1           | 0.2161  | 1      | 1      | 0.07154 | 0.5925  | 1      | 0.004083 | 1      | 0.1198  | 0.1393  | 0         | 0.0002077 |
| 13          | 0.2173      | 1       | 1      | 0.9948 | 1       | 1       | 0.4207 | 1        | 1      | 1       | 1       | 0.0162    | 0         |
