# Supplementary material
Source: PubMed Central journal article supplement (PMC3631344)

SUPPLEMENTARY DATA

Fig. S3. Complete data set of stomatal conductance vs time of day for each lamina zone.

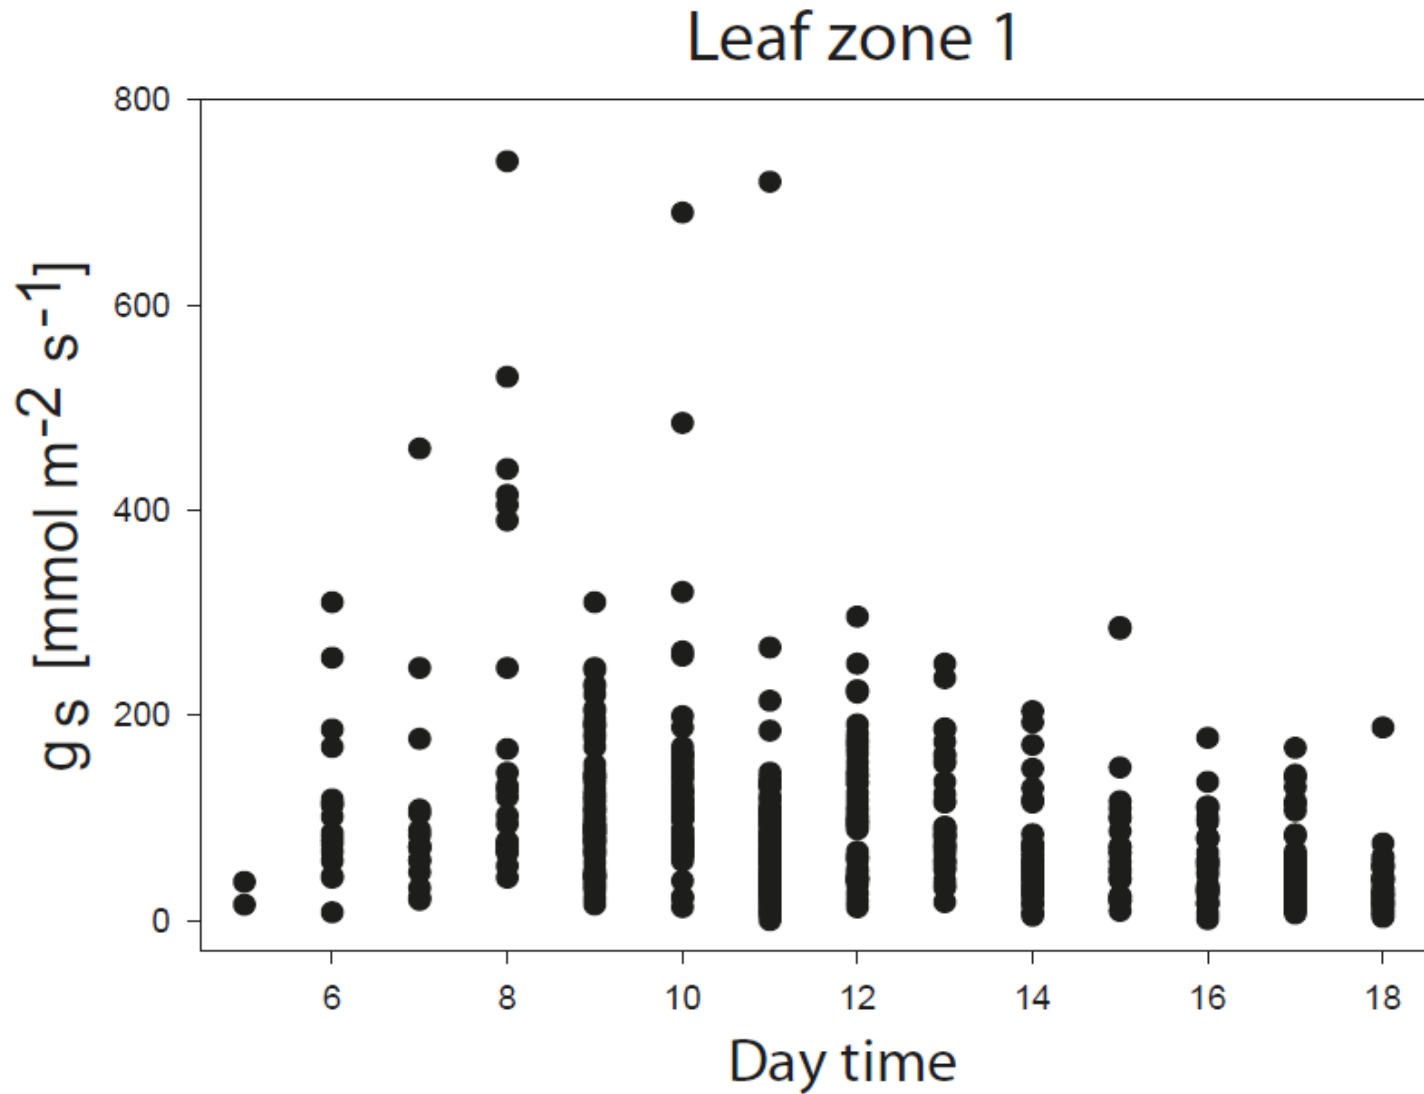

# Leaf zone 2

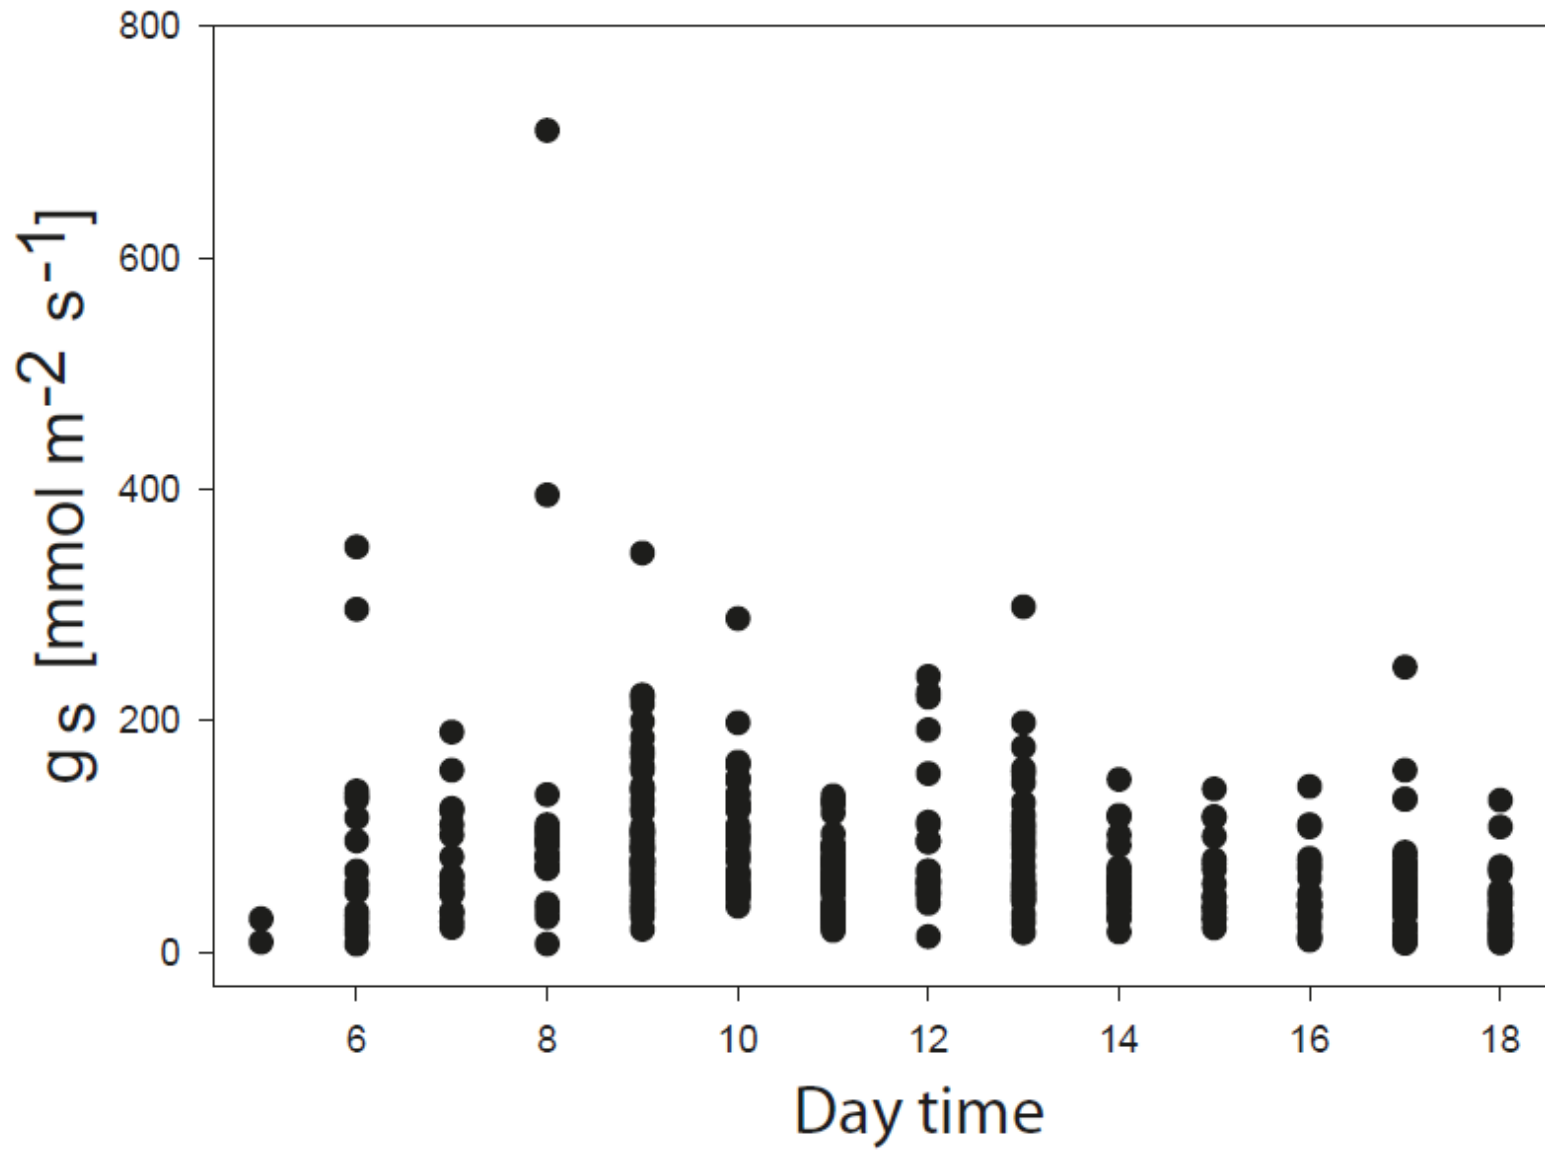

# Leaf zone 3

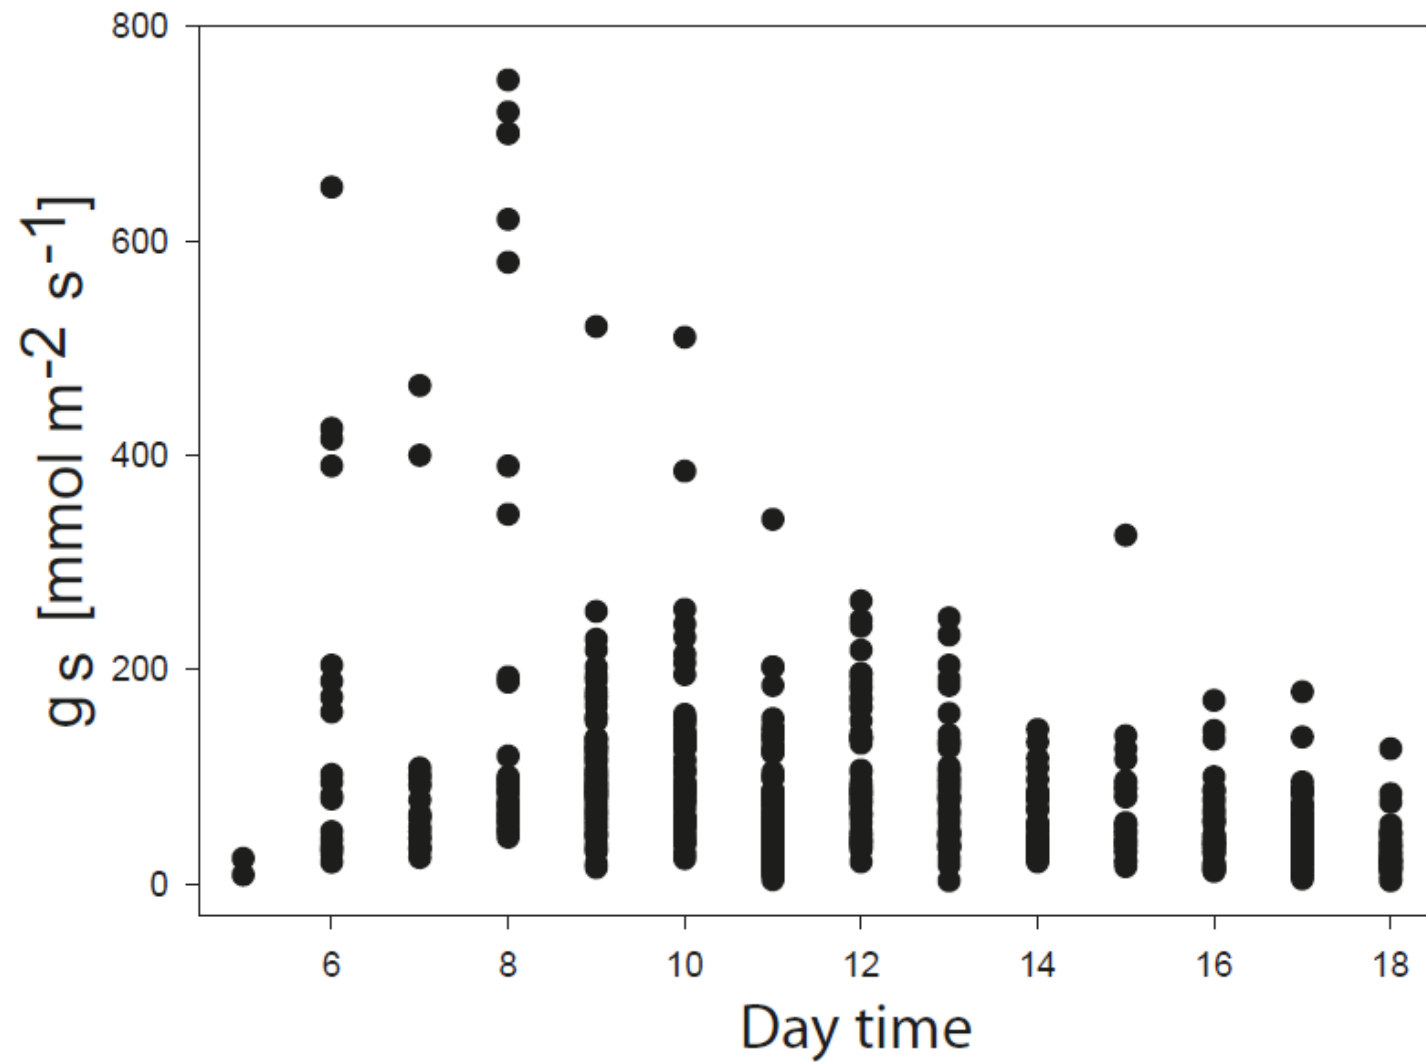

# Leaf zone 4

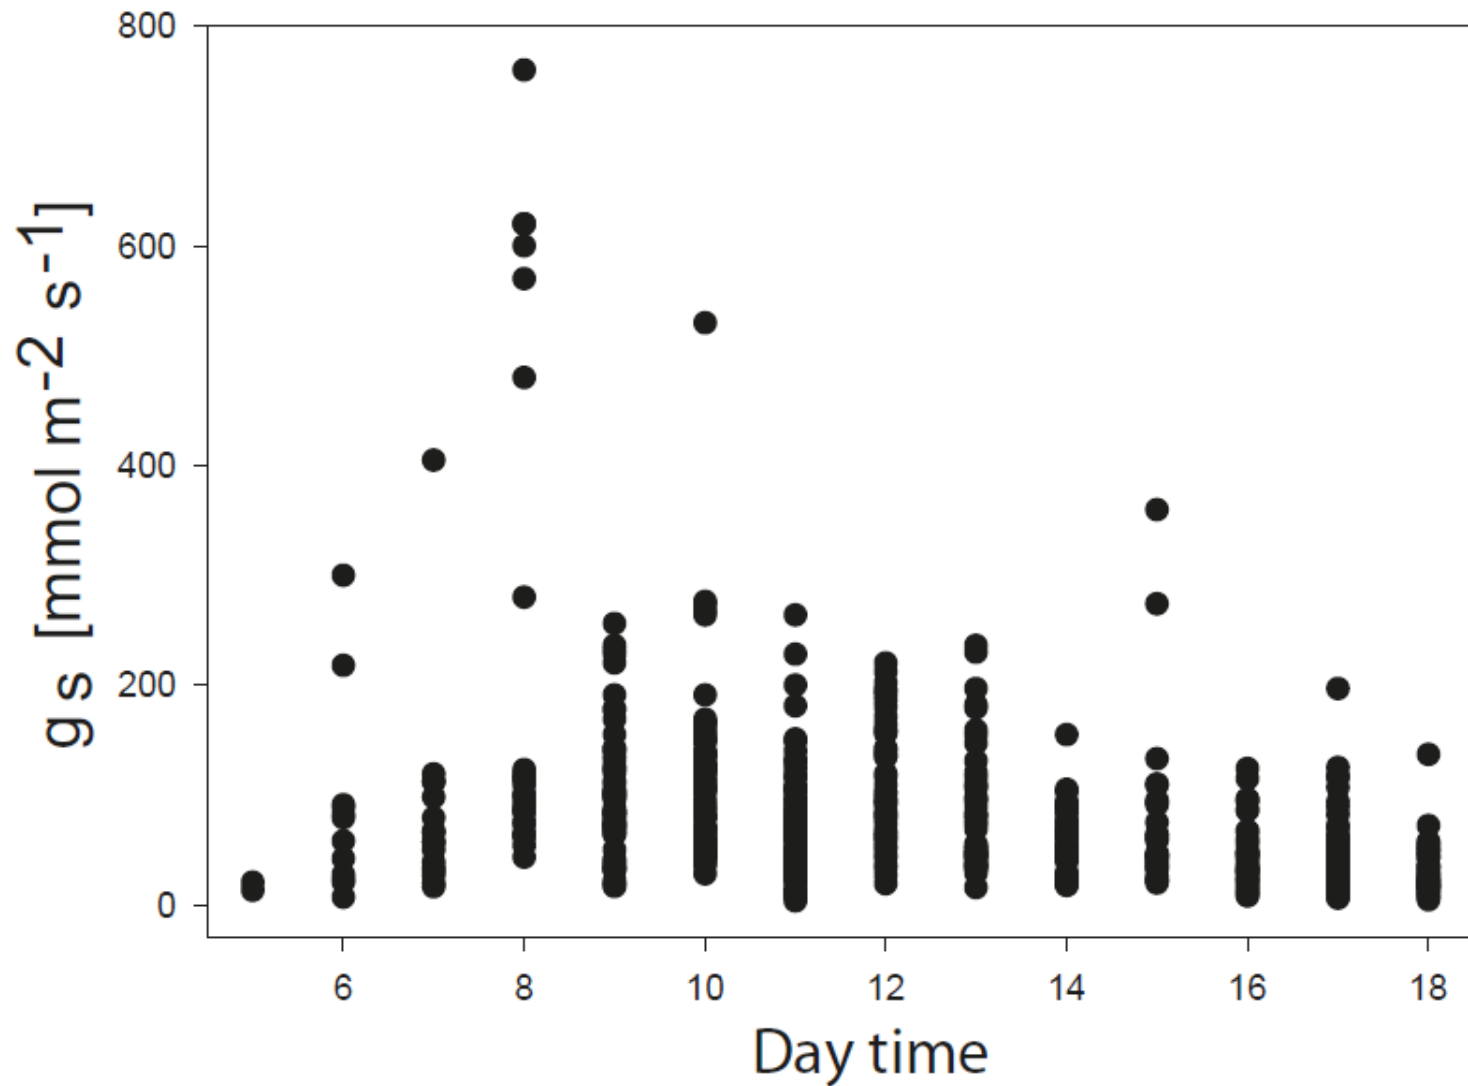

# Leaf zone 5

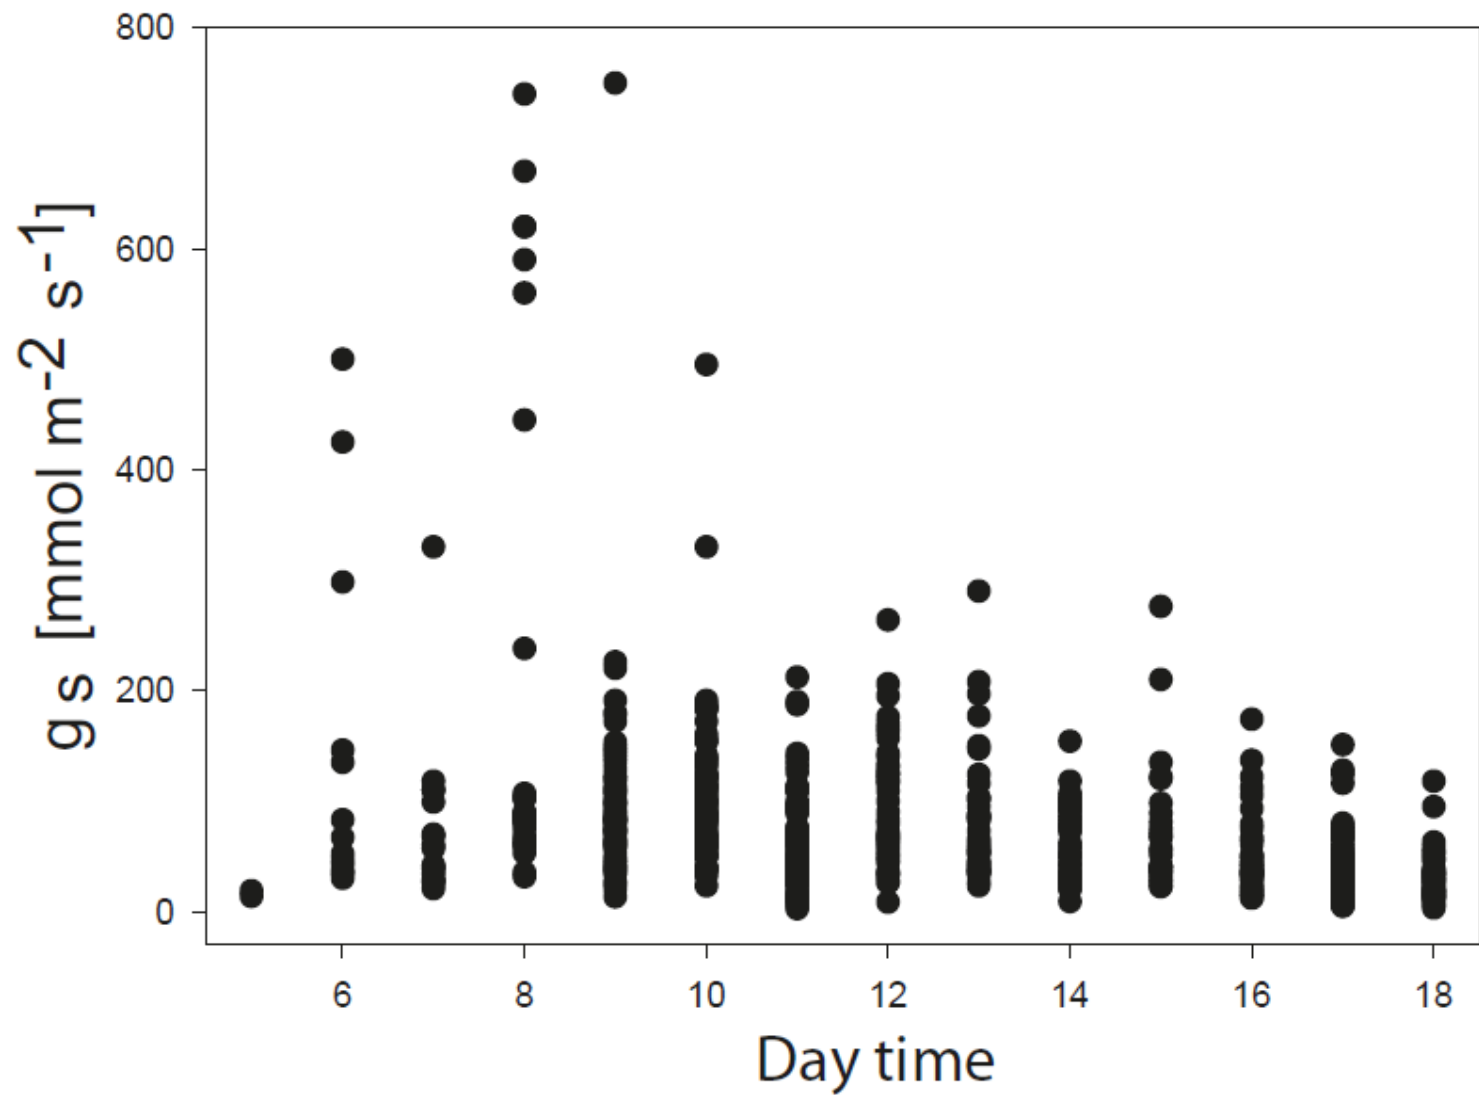

# Leaf zone 6

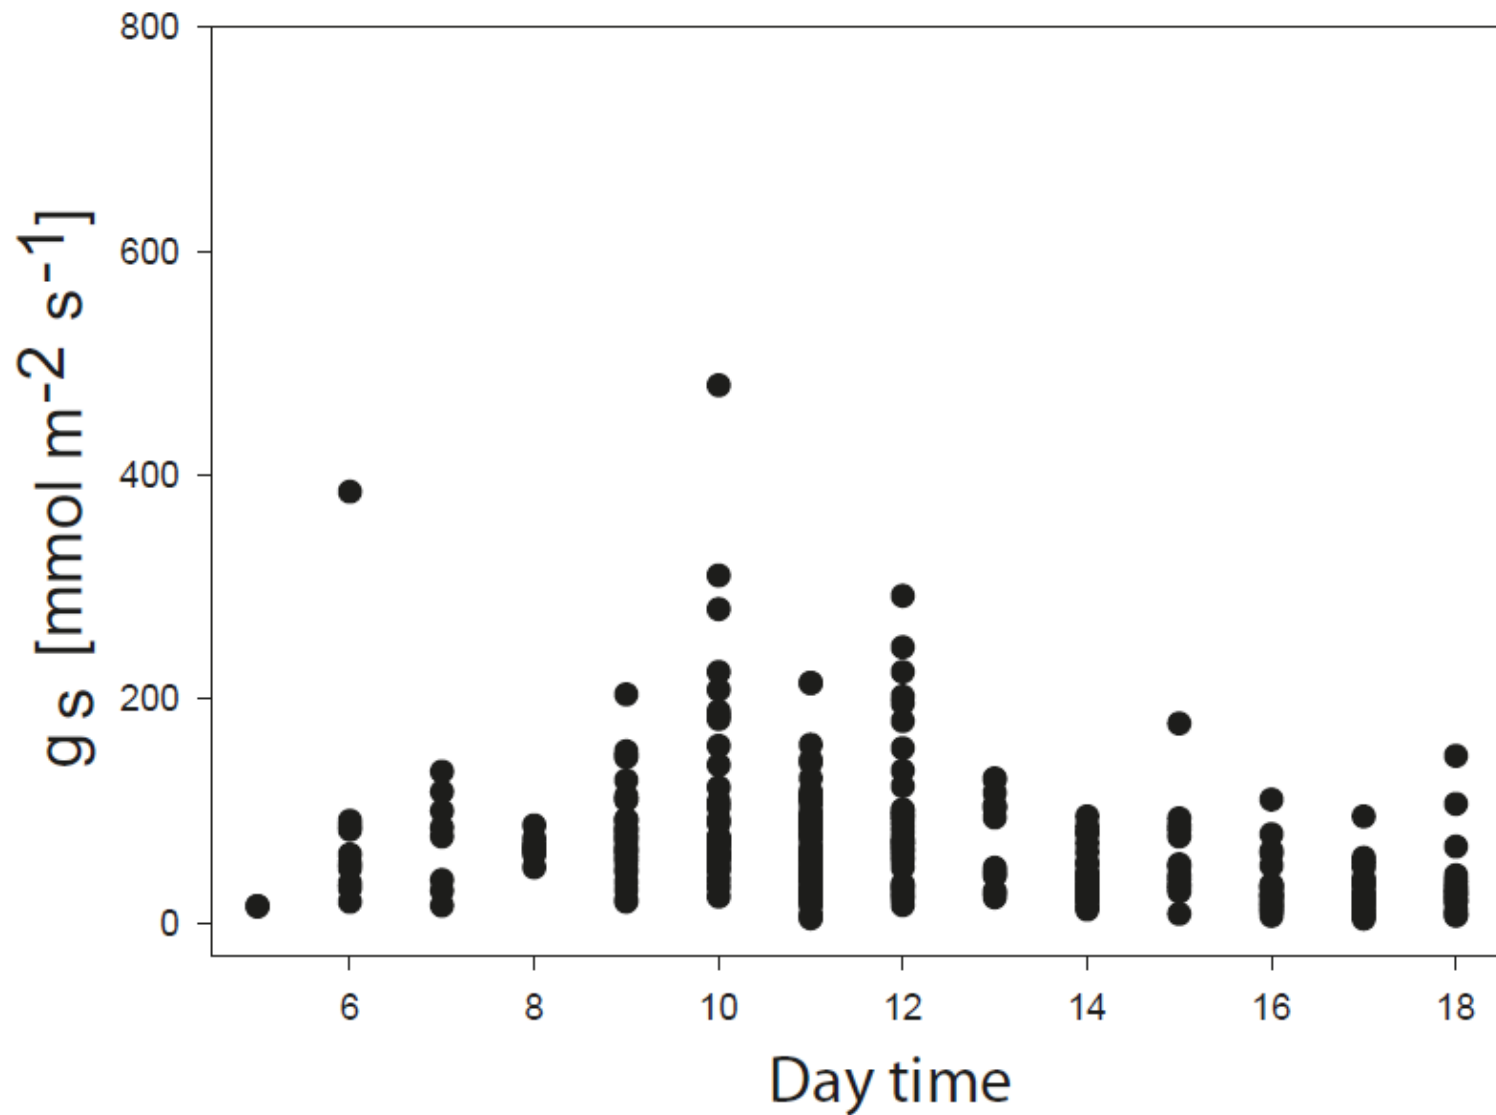

# Leaf zone 7

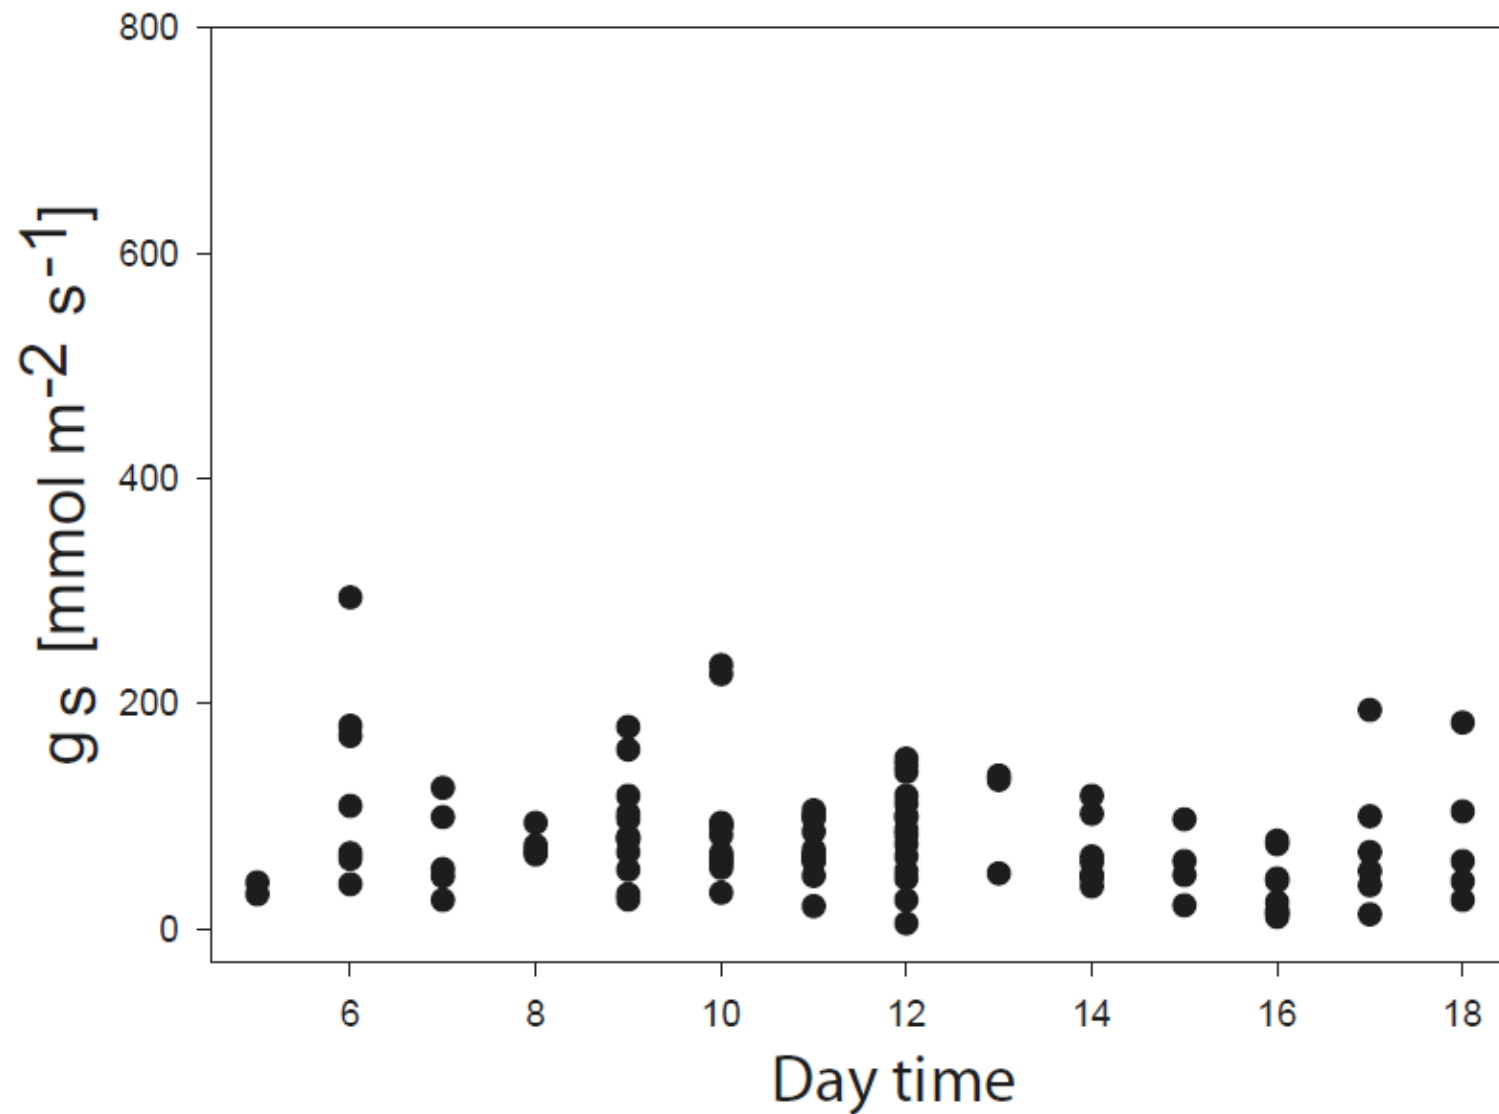

# Leaf zone 8

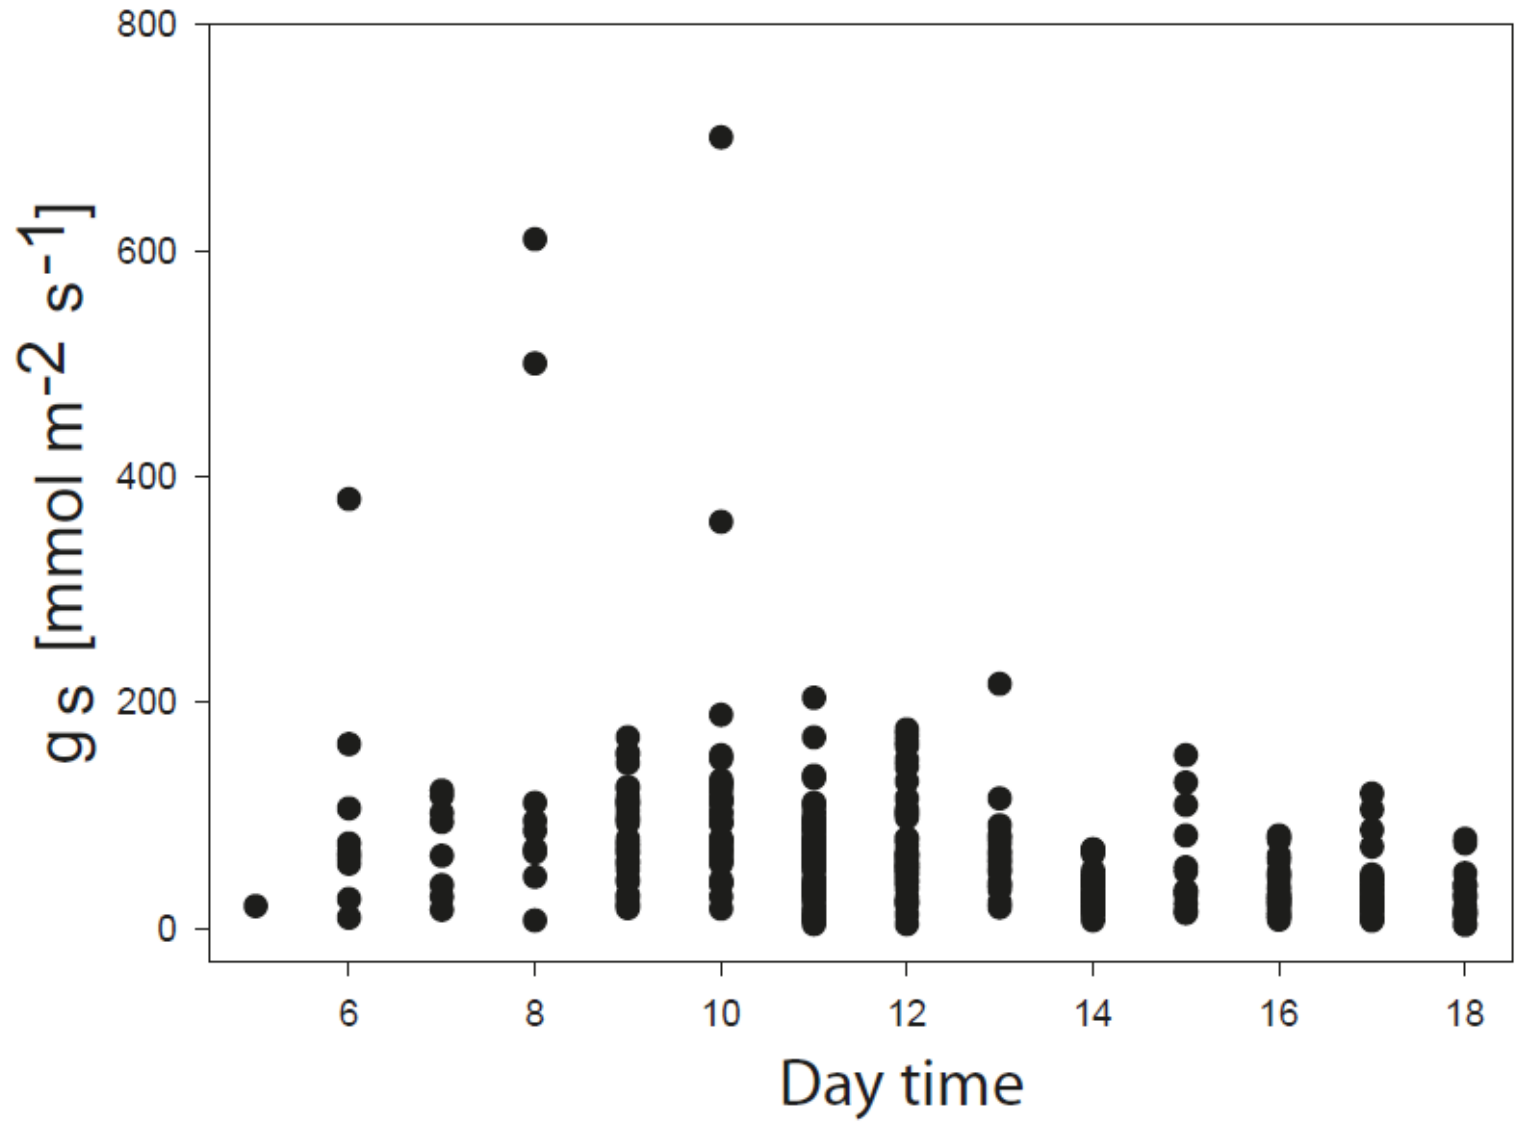



# Leaf zone 9

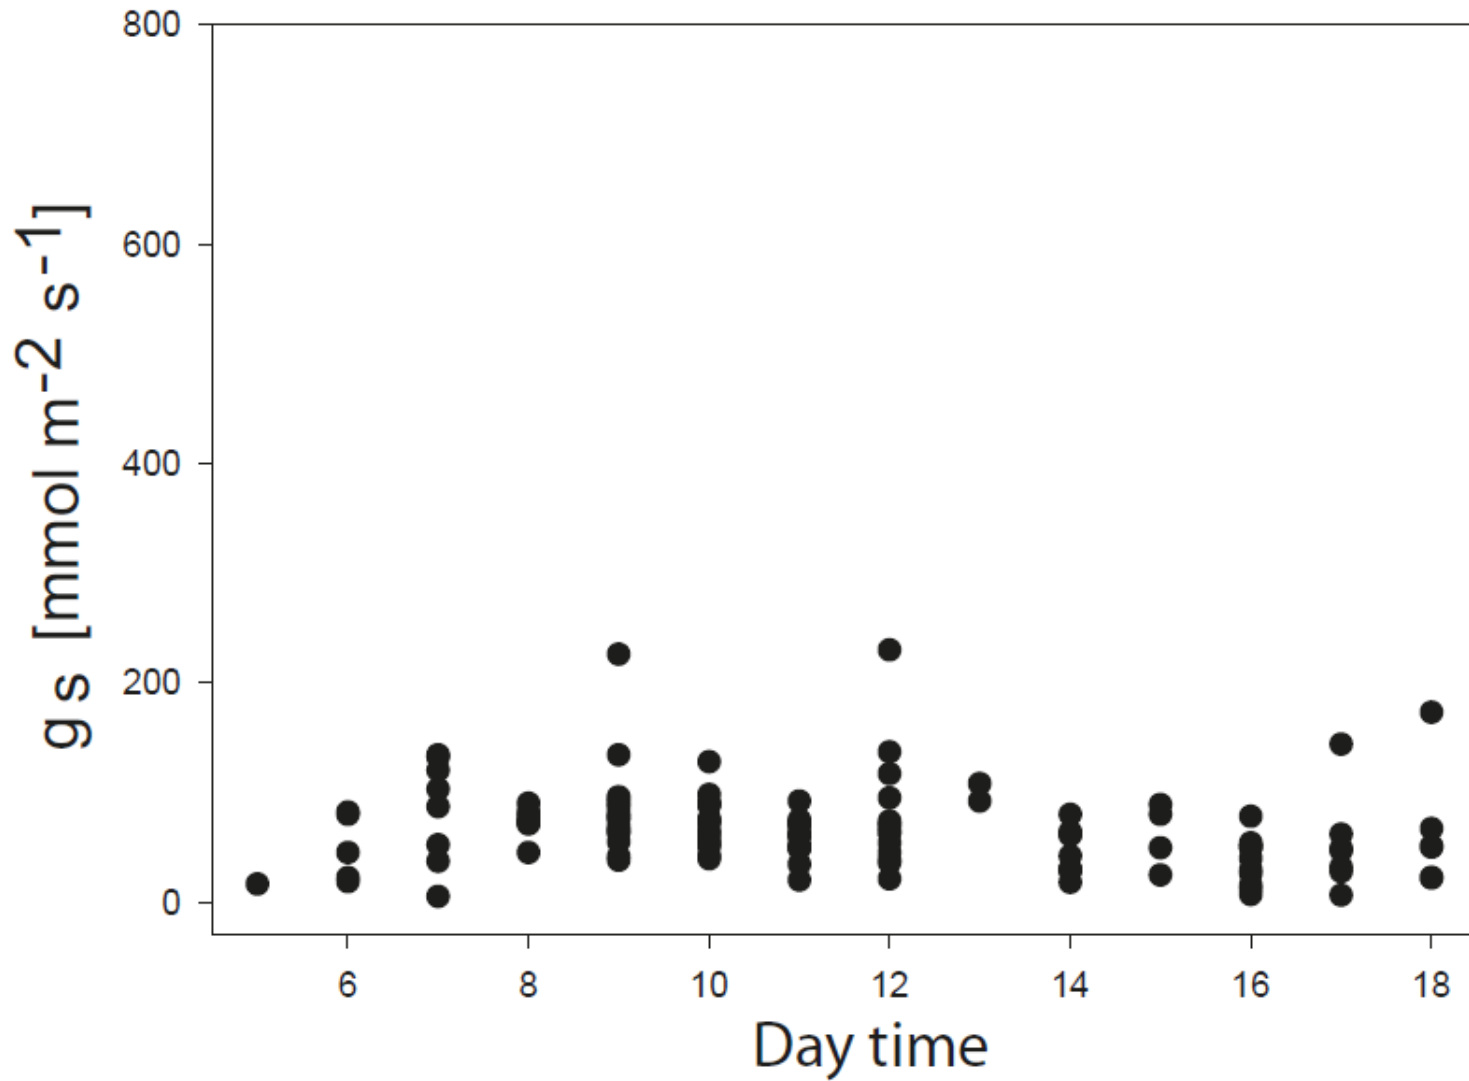

# Leaf zone 10

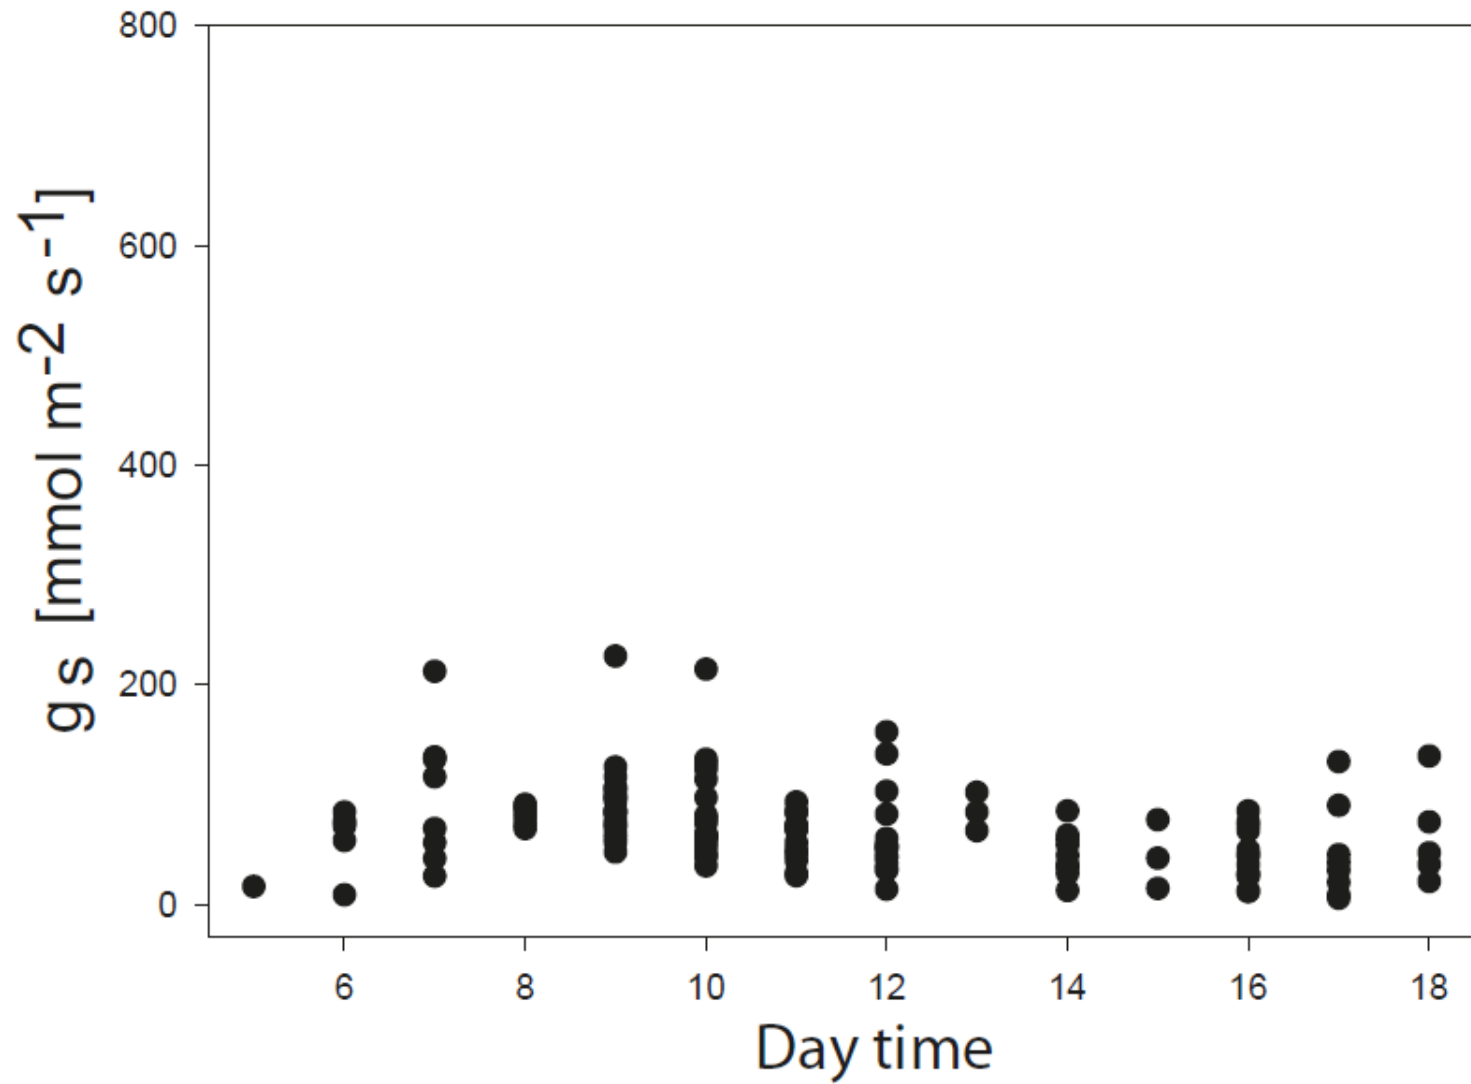

# Leaf zone 11

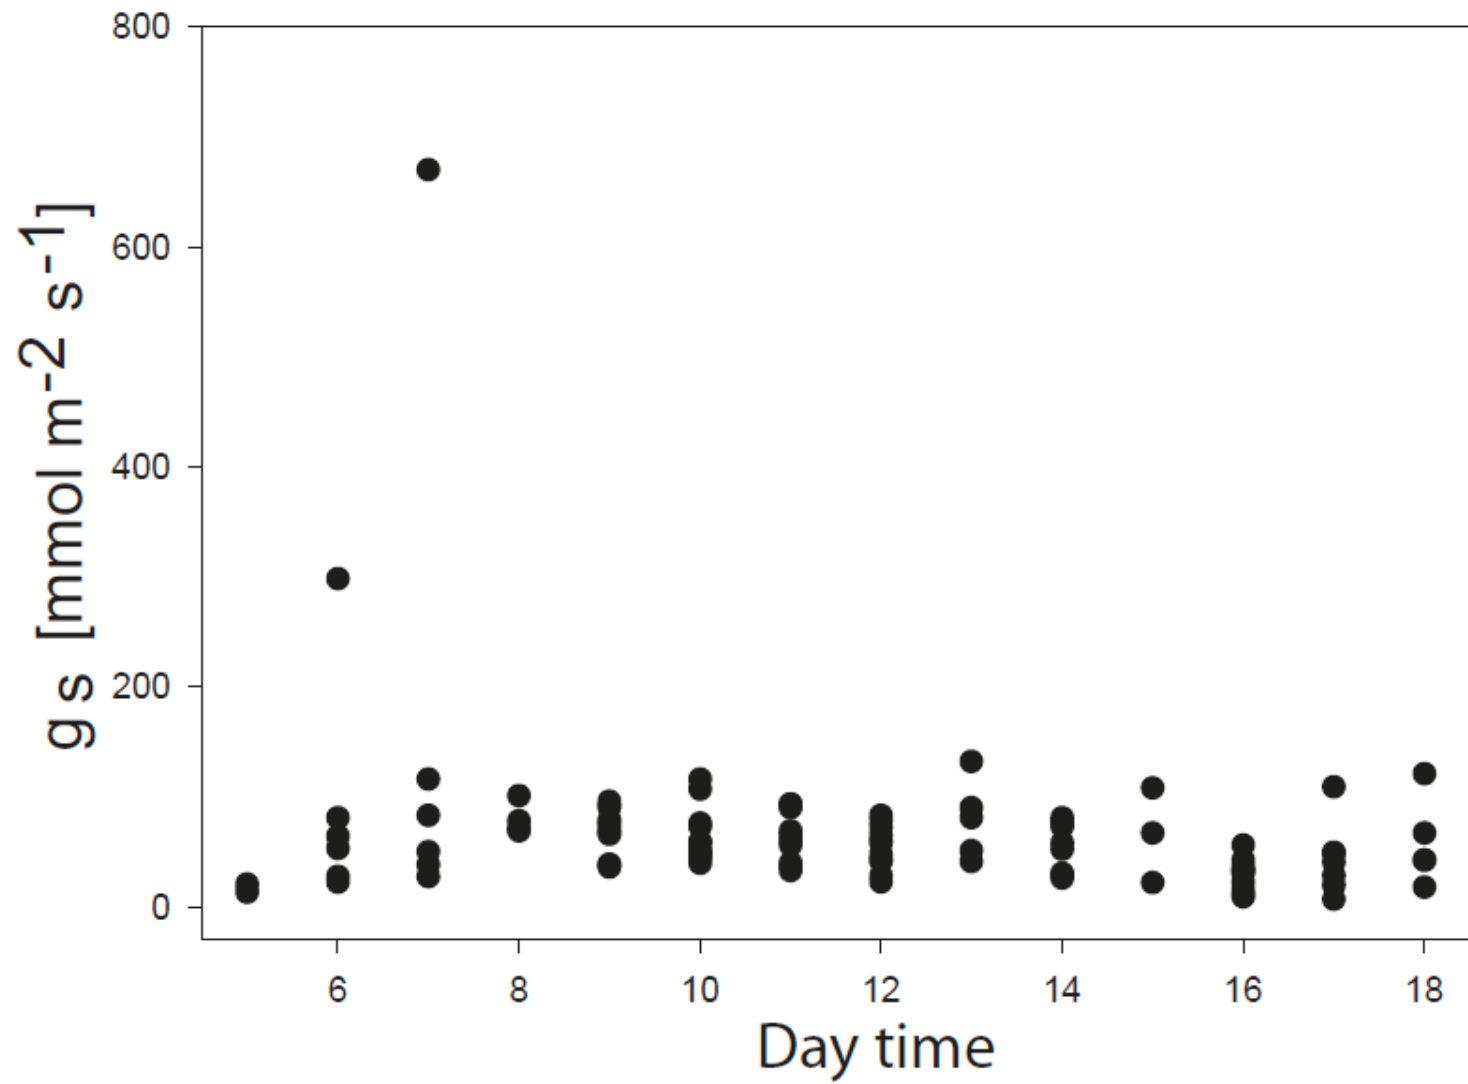

# Leaf zone 12

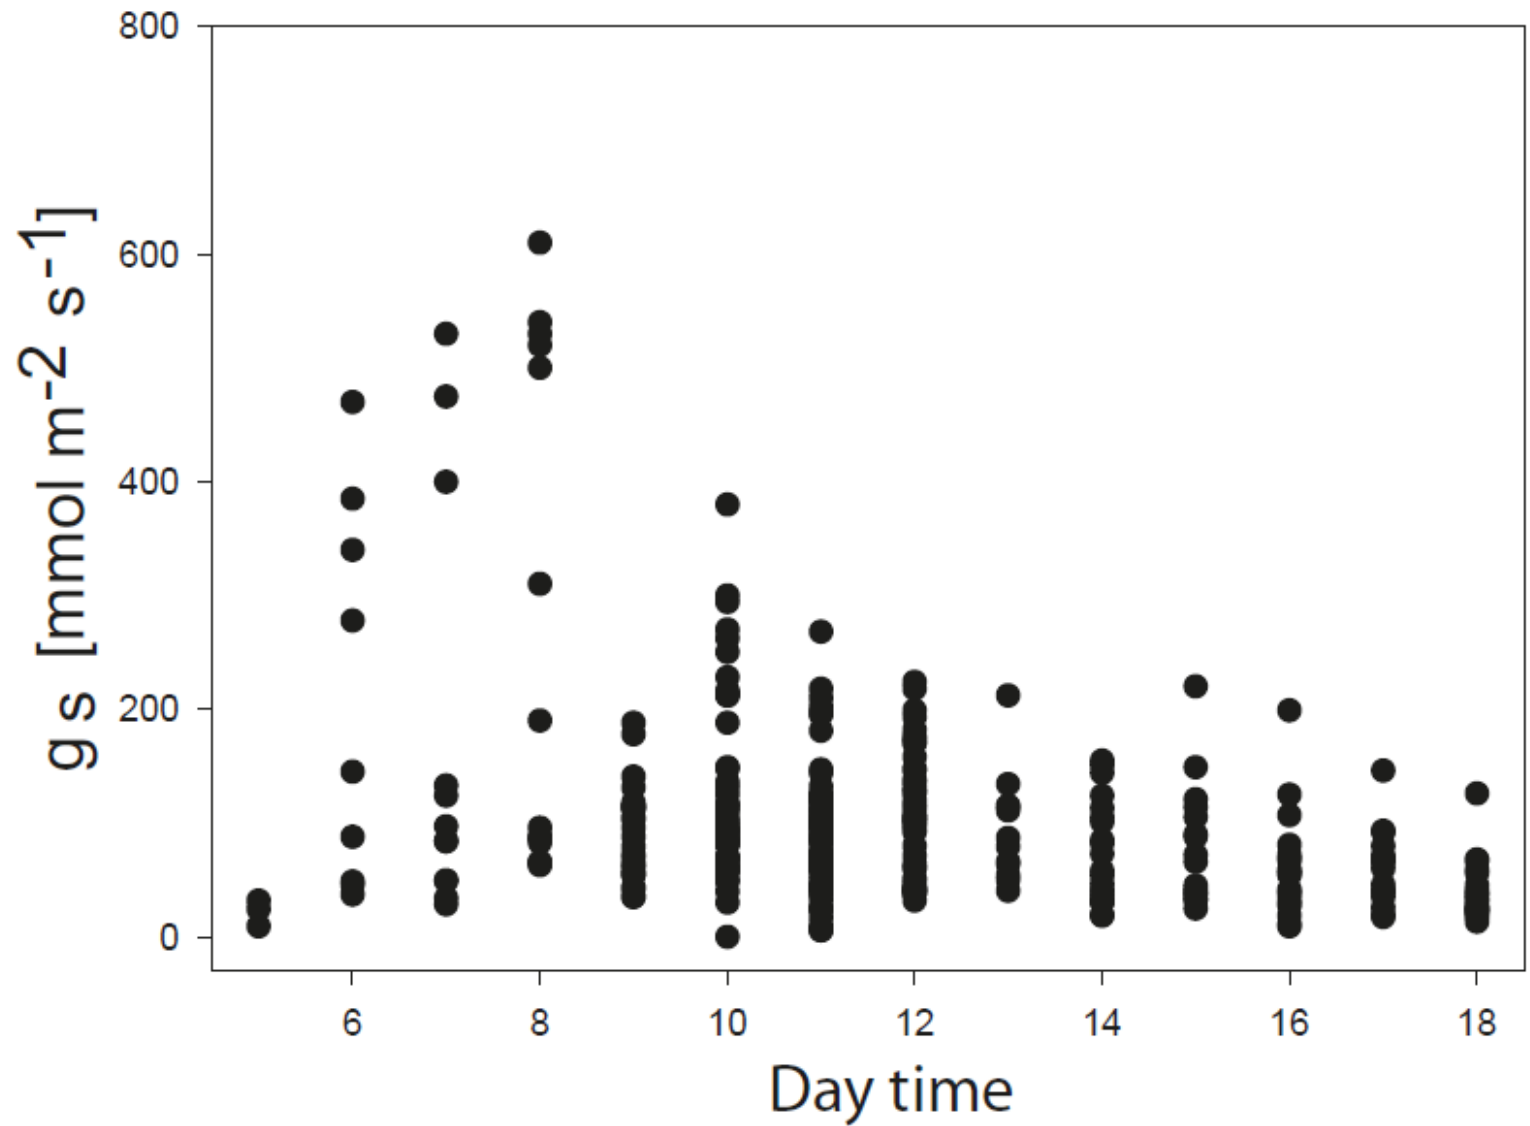

# Leaf zone 13

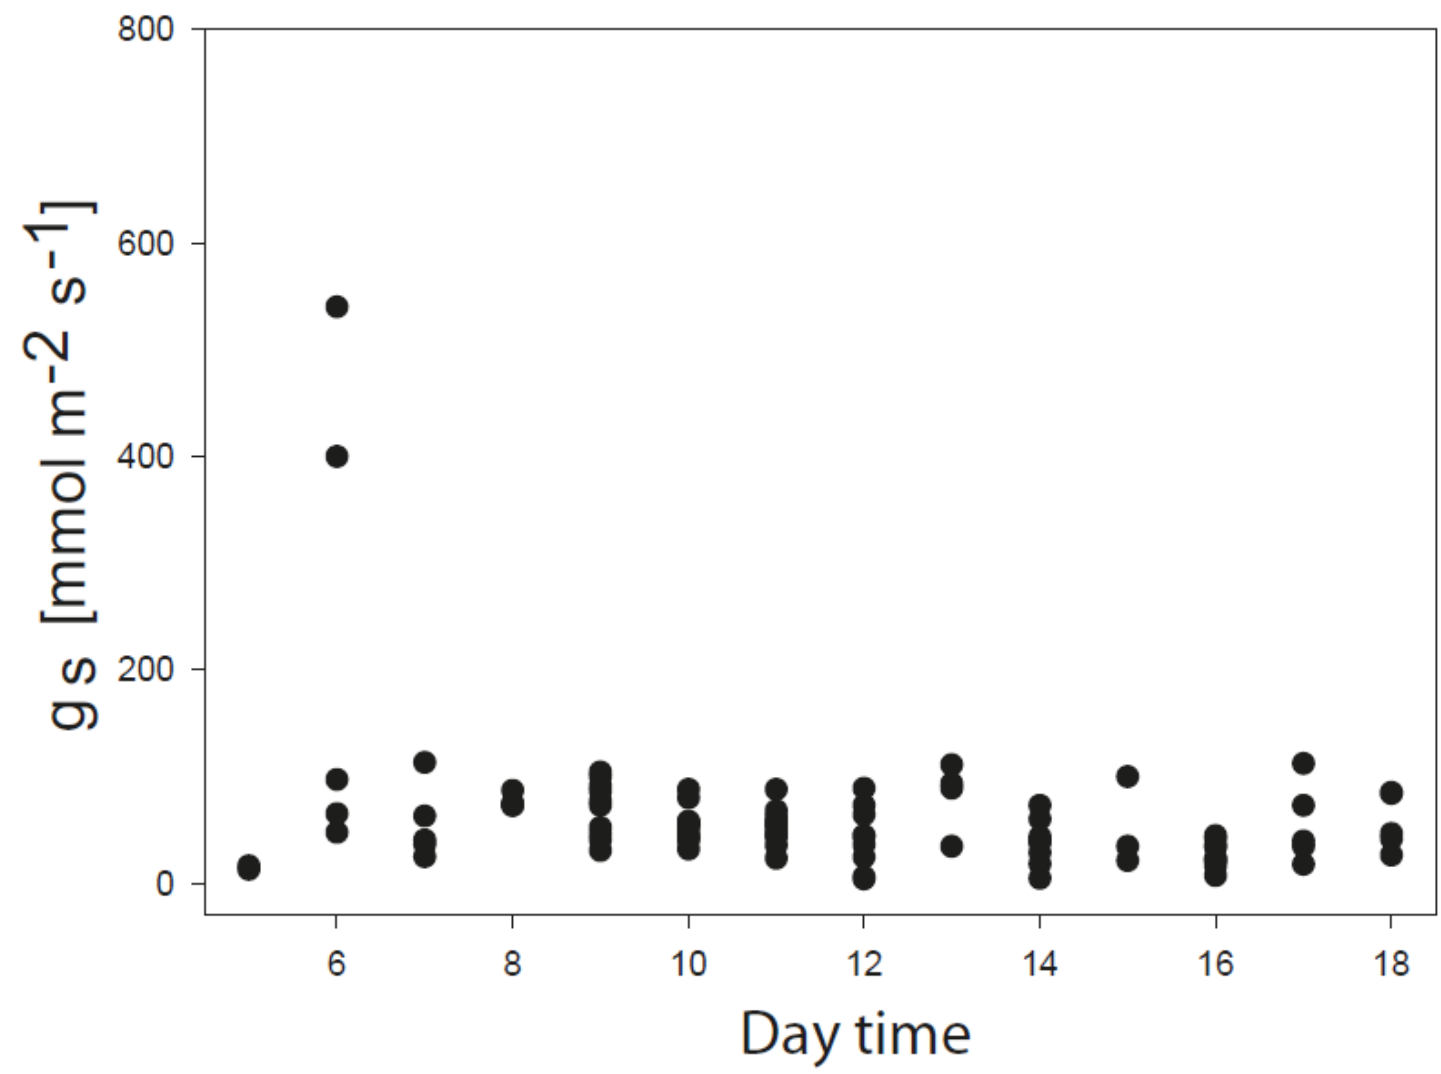

Supplement: supp_mct061_mct061supp1.pdf [file supp_mct061_mct061supp1.pdf]
